# Supplementary material for: Seed size and burial depth influence Zostera marina L. (eelgrass) seed survival, seedling emergence and initial seedling biomass development
Source: PLoS One. 2019 Apr 11;14(4):e0215157. doi: 10.1371/journal.pone.0215157 (PMC6459501; doi:10.1371/journal.pone.0215157)
Supplement: S1 Table — (XLSX) [file pone.0215157.s001.xlsx]

## Sheet: Seed size metrics
Seed size grouping	length (mm)	width (mm)	surface (mm2)	volume (mm3)		Seed size grouping	weight (mg DW)
unsorted	3.842	1.739	5.646	6.08352		unsorted	4.13
unsorted	3.761	1.853	5.759	6.76165		unsorted	4.038
unsorted	3.798	1.81	6.315	6.51494		unsorted	2.174
unsorted	3.133	1.442	3.666	3.41106		unsorted	4.012
unsorted	3.544	1.766	5.482	5.78727		unsorted	3.812
unsorted	3.54	1.693	4.777	5.31271		unsorted	5.25
unsorted	3.264	1.732	5.239	5.12678		unsorted	1.444
unsorted	3.371	1.703	4.596	5.11902		unsorted	5.248
unsorted	3.632	1.657	4.829	5.22143		unsorted	3.658
unsorted	3.694	1.907	5.756	7.03391		unsorted	3.308
unsorted	3.441	1.392	3.984	3.4911		unsorted	3.042
unsorted	3.687	2.013	6.045	7.82275		unsorted	5.778
unsorted	3.695	1.788	5.958	6.18512		unsorted	3.988
unsorted	3.262	1.687	5.312	4.86086		unsorted	3.542
unsorted	3.572	1.819	5.474	6.18836		unsorted	4.91
unsorted	3.542	1.706	5.186	5.39766		unsorted	2.694
unsorted	3.562	1.797	5.784	6.02266		unsorted	4.226
unsorted	3.885	1.595	5.319	5.17501		unsorted	4.728
unsorted	3.558	1.731	5.206	5.58211		unsorted	4.276
unsorted	3.41	1.426	4.131	3.63071		unsorted	2.956
unsorted	3.151	1.326	4.291	2.90091		unsorted	2.474
unsorted	3.874	1.578	5.098	5.05094		unsorted	3.838
unsorted	3.174	1.585	4.14	4.17507		unsorted	4.206
unsorted	3.444	1.394	4.113	3.50419		unsorted	3.09
unsorted	3.197	1.68	4.417	4.72454		unsorted	2.198
unsorted	3.609	1.795	5.971	6.08856		unsorted	1.672
unsorted	3.635	1.527	4.575	4.43794		unsorted	3.012
unsorted	3.297	1.672	4.602	4.82603		unsorted	2.844
unsorted	3.592	1.697	5.741	5.41625		unsorted	3.748
unsorted	3.636	1.781	5.155	6.0388		unsorted	2.2
unsorted	3.255	1.566	4.134	4.17958		unsorted	2.958
unsorted	3.796	1.932	6.14	7.41889		unsorted	2.162
unsorted	3.605	1.44	4.129	3.91407		unsorted	4.532
unsorted	3.35	1.387	4.113	3.3744		unsorted	2.196
unsorted	3.822	1.582	5.154	5.00844		unsorted	2.418
unsorted	3.411	1.597	5.201	4.55502		unsorted	4.774
unsorted	3.21	1.449	4.01	3.52891		unsorted	3.672
unsorted	3.693	1.739	5.322	5.84759		unsorted	4.062
unsorted	3.594	1.917	5.854	6.91546		unsorted	4.446
unsorted	3.693	1.56	4.724	4.70573		unsorted	3.576
unsorted	3.073	1.604	4.591	4.13971		unsorted	4.178
unsorted	3.232	1.521	4.072	3.91497		unsorted	4.834
unsorted	3.321	1.391	4.584	3.36451		unsorted	2.96
unsorted	3.551	1.61	5.663	4.81949		unsorted	2.466
unsorted	3.657	2.039	6.248	7.96082		unsorted	4.048
unsorted	3.297	1.533	4.299	4.05697		unsorted	2.478
unsorted	3.169	1.483	3.976	3.64925		unsorted	2.562
unsorted	3.545	1.856	6.195	6.39397		unsorted	2.604
unsorted	3.472	1.5	4.429	4.09035		unsorted	3.638
unsorted	3.51	1.835	5.443	6.18839		unsorted	5.36
unsorted	3.462	1.683	5.313	5.13445		unsorted	2.66
unsorted	3.779	1.902	5.93	7.15808		unsorted	4.408
unsorted	3.24	1.45	4.188	3.56681		unsorted	1.994
unsorted	3.593	1.797	5.842	6.07508		unsorted	3.216
unsorted	3.574	1.608	4.937	4.83866		unsorted	3.956
unsorted	3.202	1.616	4.793	4.37827		unsorted	1.906
unsorted	3.712	1.685	5.341	5.51831		unsorted	4.846
unsorted	3.473	1.809	5.882	5.95087		unsorted	4.954
unsorted	3.355	1.338	4.02	3.14487		unsorted	4.096
unsorted	3.301	1.348	3.716	3.14068		unsorted	3.376
unsorted	3.241	1.557	4.387	4.11391		unsorted	3.146
unsorted	3.01	1.364	3.386	2.9322		unsorted	2.19
unsorted	3.598	1.722	5.703	5.58632		unsorted	4.528
unsorted	3.221	1.62	4.477	4.42608		unsorted	1.912
unsorted	3.748	1.744	5.865	5.96886		unsorted	3.148
unsorted	3.399	1.526	4.378	4.14437		unsorted	2.762
unsorted	3.425	1.582	4.802	4.4882		unsorted	4.232
unsorted	3.235	1.376	3.719	3.20708		unsorted	2.898
unsorted	3.355	1.53	4.098	4.1122		unsorted	1.816
unsorted	3.449	1.654	4.743	4.94041		unsorted	3.57
unsorted	3.912	1.944	6.298	7.74087		unsorted	3.354
unsorted	3.26	1.652	4.307	4.65839		unsorted	2.626
unsorted	3.524	1.612	4.791	4.79473		unsorted	3.614
unsorted	3.34	1.635	4.759	4.67499		unsorted	4.712
unsorted	2.933	1.481	3.8	3.36838		unsorted	3.462
unsorted	3.162	1.605	4.266	4.26492		unsorted	4.8
unsorted	3.2	1.594	4.538	4.25721		unsorted	3.518
unsorted	3.805	1.779	5.544	6.30529		unsorted	3.266
unsorted	3.449	1.597	4.789	4.60576		unsorted	3.844
unsorted	3.307	1.558	4.673	4.20308		unsorted	2.66
unsorted	3.231	1.497	4.532	3.79122		unsorted	3.784
unsorted	3.453	1.462	4.509	3.86447		unsorted	3.948
unsorted	3.537	1.572	5.039	4.57656		unsorted	3.672
unsorted	3.428	1.602	4.894	4.60643		unsorted	2.394
unsorted	3.651	1.731	5.566	5.72802		unsorted	3.15
unsorted	3.43	1.619	4.43	4.70746		unsorted	4.24
unsorted	3.451	1.461	4.388	3.85695		unsorted	3.56
unsorted	3.37	1.531	4.286	4.13598		unsorted	2.544
unsorted	3.536	1.649	4.828	5.03445		unsorted	3.188
unsorted	3.603	1.545	5.014	4.50319		unsorted	2.708
unsorted	3.216	1.514	4.51	3.85981		unsorted	3.872
unsorted	3.403	1.566	4.979	4.36962		unsorted	3.792
unsorted	3.717	1.808	5.447	6.36192		unsorted	1.652
unsorted	3.428	1.587	4.601	4.52057		unsorted	5.086
unsorted	3.587	1.858	5.77	6.48368		unsorted	6.572
unsorted	3.303	1.622	4.943	4.54997		unsorted	3.56
unsorted	3.424	1.58	4.943	4.47555		unsorted	2.858
unsorted	3.403	1.667	4.979	4.95144		unsorted	2.094
unsorted	3.897	2.087	6.695	8.88738		unsorted	5.534
unsorted	3.603	1.973	5.931	7.34374		unsorted	3.004
small	3.647	1.524	5.04	4.43511		small	3.19
small	3.33	1.511	4.711	3.98081		small	3.31
small	3.434	1.555	4.888	4.3477		small	2.436
small	3.991	1.44	5.641	4.33317		small	3.028
small	3.584	1.445	4.967	3.91834		small	2.744
small	3.55	1.64	5.003	4.99936		small	2.69
small	3.498	1.586	5.129	4.60707		small	3.938
small	3.155	1.613	4.396	4.298		small	3.382
small	3.052	1.505	4.364	3.61956		small	2.096
small	3.104	1.679	4.551	4.58165		small	2.526
small	3.403	1.494	4.196	3.97706		small	3.688
small	3.394	1.409	4.448	3.52803		small	2.138
small	3.696	1.535	4.818	4.55982		small	2.308
small	3.608	1.528	5.23	4.41074		small	3.244
small	3.232	1.638	5.013	4.54044		small	1.896
small	3.432	1.656	4.641	4.92795		small	2.23
small	3.353	1.405	4.361	3.46565		small	2.264
small	3.434	1.484	5.063	3.95974		small	3.812
small	3.392	1.396	3.996	3.46119		small	2.79
small	3.571	1.625	5.605	4.93736		small	3.04
small	3.45	1.531	5.13	4.23417		small	3.852
small	3.258	1.515	4.298	3.91539		small	1.418
small	3.49	1.412	4.232	3.64329		small	2.556
small	3.425	1.583	4.513	4.49388		small	3.47
small	3.454	1.674	5.137	5.06794		small	3.204
small	3.208	1.602	4.283	4.3108		small	3.526
small	3.519	1.615	4.698	4.80577		small	2.802
small	3.474	1.56	4.967	4.42667		small	3.05
small	3.338	1.359	3.742	3.22793		large	4.456
small	3.383	1.53	4.466	4.14652		large	4.54
large	3.365	1.981	5.713	6.91437		large	5.124
large	3.373	1.77	5.889	5.53301		large	5.216
large	3.811	1.947	7.056	7.56431		large	5.782
large	4.021	1.745	6.639	6.41097		large	7.08
large	3.412	1.89	5.393	6.38162		large	5.4
large	3.953	2.271	7.676	10.6748		large	5.028
large	3.931	1.802	6.201	6.68361		large	5.776
large	3.788	1.797	6.626	6.40479		large	4.718
large	3.694	1.853	5.464	6.6412		large	4.208
large	3.672	2.044	6.237	8.03273		large	5.18
large	3.871	2.028	7.137	8.336		large	3.922
large	3.563	1.932	6.133	6.96352		large	3.398
large	3.616	1.781	5.478	6.00558		large	3.21
large	3.83	2.036	6.393	8.31291		large	4.556
large	3.878	1.718	6.126	5.99312		large	4.686
large	3.85	1.826	6.391	6.72142		large	3.834
large	3.755	1.673	5.325	5.50301		large	4.266
large	3.698	1.913	5.825	7.08591		large	4.92
large	3.981	1.863	6.143	7.23463		large	5.662
large	3.474	1.895	6.064	6.53201		large	4.924
large	3.625	1.966	6.411	7.33624		large	5.322
large	3.546	1.857	6.302	6.40267		large	3.8
large	3.631	1.81	6.323	6.22848		large	4.914
large	3.662	2.025	6.653	7.86262		large	4.934
large	3.89	1.911	6.835	7.43823		large	5.62
large	3.62	2.045	6.459	7.92673		large	4.172
large	3.712	1.843	5.811	6.60172		large	4.846
large	3.789	2.001	7.196	7.9436
large	3.65	1.747	5.289	5.8328
large	3.797	1.819	5.854	6.57816

## Sheet: Seed weight
Seed	weight
L	4.456
L	4.54
L	5.124
L	5.216
L	5.782
L	7.08
L	5.4
L	5.028
L	5.776
L	4.718
L	4.208
L	5.18
L	3.922
L	3.398
L	3.21
L	4.556
L	4.686
L	3.834
L	4.266
L	4.92
L	5.662
L	4.924
L	5.322
L	3.8
L	4.914
L	4.934
L	5.62
L	4.172
L	4.846
S	3.19
S	3.31
S	2.436
S	3.028
S	2.744
S	2.69
S	3.938
S	3.382
S	2.096
S	2.526
S	3.688
S	2.138
S	2.308
S	3.244
S	1.896
S	2.23
S	2.264
S	3.812
S	2.79
S	3.04
S	3.852
S	1.418
S	2.556
S	3.47
S	3.204
S	3.526
S	2.802
S	3.05
U	4.13
U	4.038
U	2.174
U	4.012
U	3.812
U	5.25
U	1.444
U	5.248
U	3.658
U	3.308
U	3.042
U	5.778
U	3.988
U	3.542
U	4.91
U	2.694
U	4.226
U	4.728
U	4.276
U	2.956
U	2.474
U	3.838
U	4.206
U	3.09
U	2.198
U	1.672
U	3.012
U	2.844
U	3.748
U	2.2
U	2.958
U	2.162
U	4.532
U	2.196
U	2.418
U	4.774
U	3.672
U	4.062
U	4.446
U	3.576
U	4.178
U	4.834
U	2.96
U	2.466
U	4.048
U	2.478
U	2.562
U	2.604
U	3.638
U	5.36
U	2.66
U	4.408
U	1.994
U	3.216
U	3.956
U	1.906
U	4.846
U	4.954
U	4.096
U	3.376
U	3.146
U	2.19
U	4.528
U	1.912
U	3.148
U	2.762
U	4.232
U	2.898
U	1.816
U	3.57
U	3.354
U	2.626
U	3.614
U	4.712
U	3.462
U	4.8
U	3.518
U	3.266
U	3.844
U	2.66
U	3.784
U	3.948
U	3.672
U	2.394
U	3.15
U	4.24
U	3.56
U	2.544
U	3.188
U	2.708
U	3.872
U	3.792
U	1.652
U	5.086
U	6.572
U	3.56
U	2.858
U	2.094
U	5.534
U	3.004
